# Supplementary material for: The hTERT and iCasp9 Transgenes Affect EOMES and T-BET Levels in NK Cells and the Introduction of Both Genes Improves NK Cell Proliferation in Response to IL2 and IL15 Stimulation
Source: MDPI journal article supplement (doi:10.3390/biomedicines12030650), 2024-03-14
Supplement: s1 [file s1]

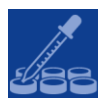

**Table S1.** List of used primers.

| Gene          | Primer               | Primer sequence                 |
|---------------|----------------------|---------------------------------|
| <i>ACTB</i>   | B-actin F            | CAC CAC ACC TTC TAC AAT GAG     |
|               | B-actin R            | GTC TCA AAC ATG ATC TGG GTC     |
| <i>BAD</i>    | Bad F                | TGT GGA CTC CTT TAA GAA GGG AC  |
|               | Bad R                | CAC CAG GAC TGG AAG ACT CG      |
| <i>BAK1</i>   | Bak F                | GAT CCC GGC AGG CTG ATC C       |
|               | Bak R                | GTA GCT GCG GAA AAC CTC CT      |
| <i>BAX</i>    | Bax F                | TCA TGG GCT GGA CAT TGG AC      |
|               | Bax R                | GCG TCC CAA AGT AGG AGA GG      |
| <i>BCL2</i>   | Bcl-2 F              | GTG GAG GAG CTC TTC AGG GAC     |
|               | Bcl-2-R              | ATG ACC CCA CCG AAC TCA AAG     |
| <i>BCL2L1</i> | Bcl-X <sub>L</sub> F | AGG CGG ATT TGA ATC TCT TTC TCT |
|               | Bcl-X <sub>L</sub> R | GGG CTC AAC CAG TCC ATT GT      |
| <i>BIRC5</i>  | BIRC-5 F             | CCA CTG AGA ACG AGC CAG AC      |
|               | BIRC-5 R             | GTT CCT CTA TGG GGT CGT CAT     |
| <i>DIABLO</i> | Diablo F             | AGT AAC CCT GTG TGC GGT TC      |
|               | Diablo R             | ACT GCT CTC CTC ATC AAT GCT     |
| <i>EOMES</i>  | EOMES F              | AGG CGC AAA TAA CAA CAA CAC C   |
|               | EOMES R              | ATT CAA GTC CTC CAC GCC ATC     |
| <i>iCASP9</i> | iCasp-HA F           | TGG GCT CAC TCT GAA GAC CT      |
|               | iCasp-HA R           | AGT GCG TAG TCT GGT ACG TC      |
| <i>MCL1</i>   | Mcl-1 F              | TAC TTT GGC TTG GTT TCC ATG A   |
|               | Mcl-1 R              | ATT ACT GAG CCT TCC GTC AAG T   |
| <i>PMAIP1</i> | Noxa F               | ACG AGG AAC AAG TGC AAG TAG C   |
|               | Noxa R               | CAG GTT CCT GAG CAG AAG AGT T   |
| <i>BBC3</i>   | Puma F               | GAT GAA ATT TGG CAT GGG GTC T   |
|               | Puma R               | AGG GCT GAG GAC CAC AAA TCT     |
| <i>TBX21</i>  | T-BET F              | CTG GAT GCG CCA GGA AGT TT      |
|               | T-BET R              | CTG GAG CAC AAT CAT CTG GGT     |
| <i>hTERT</i>  | hTERT F              | GCC TGA GCT GTA CTT TGT CAA     |
|               | hTERT R              | GGT TTG ATG ATG CTG GCG AT      |
| <i>TIM3</i>   | TIM3-F               | TCC AAG GAT GCT TAC CAC CAG     |
|               | TIM3-R               | AAT GTG GAT ATT TGT GTT AGA TT  |
| <i>TIGIT</i>  | TIGIT-F              | GGT CCT AGA AAG CTC AGT GGC     |
|               | TIGIT-R              | TTC TAG TCA ACG CGA CCA CC      |
| <i>PD1</i>    | PD1-F                | GTT TCC CTT CCG CTC ACC T       |
|               | PD1-R                | GTC TAA GAA CCA TCC TGG CCG     |
| <i>LAG3</i>   | LAG3-F               | GGC AAT CAT CAC AGT GAC TCC     |
|               | LAG3-R               | GAG CTC CAC ACA AAG CGT TC      |
| <i>CISH</i>   | CIS-F                | TTC AGG GAC CTC GTC CTT TG      |
|               | CIS-R                | ATG ACT GGC TTG GGC AGT TC      |
| <i>SOCS1</i>  | SOCS1-F              | TCT CAC CTC TTG AGG GGG TC      |
|               | SOCS1-R              | AGA GGT AGG AGG TGC GAG TT      |
| <i>SOCS2</i>  | SOCS2-F              | CTT GAG CCC TCC GGG AAT G       |
|               | SOCS2-R              | TCC CCA GTA CCA TCC TGT CT      |
| <i>SOCS3</i>  | SOCS3-F              | ACT GAG CCG ACC TCT CTC CT      |
|               | SOCS3-R              | GGC AGC TGG GTC ACT TTC TC      |

**Table S2.** Characteristics of the donors whose cells were used in the study. 7 healthy volunteers were randomly selected. They had no symptoms of colds or malaise before blood sampling. The age of the donors ranged from 29 to 53 years. The blood serum was analyzed for the presence of specific IgG to such common viruses as CMV, SARS-CoV-2, and EBV.

| Group I | Donor | Gender | Age | CMV | SARS-Cov-2 | EBV |
|---------|-------|--------|-----|-----|------------|-----|
|         | 1     | Male   | 33  | -   | +          | +/- |

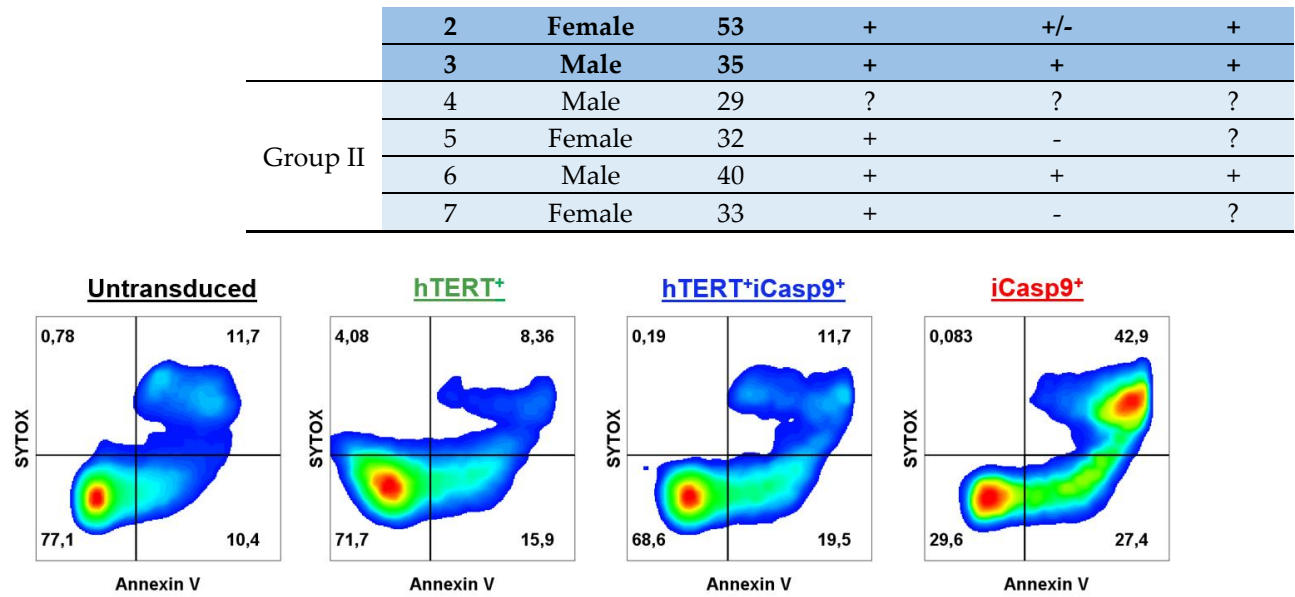

**Figure S1.** Representative plots for apoptosis detection. NK cells untransduced and transduced with hTERT and/or iCasp9 genes were stained with Annexin V and SYTOX after 24 h incubation with chemical inducer of dimerization. The lowest left square represents the fraction of live NK cells.

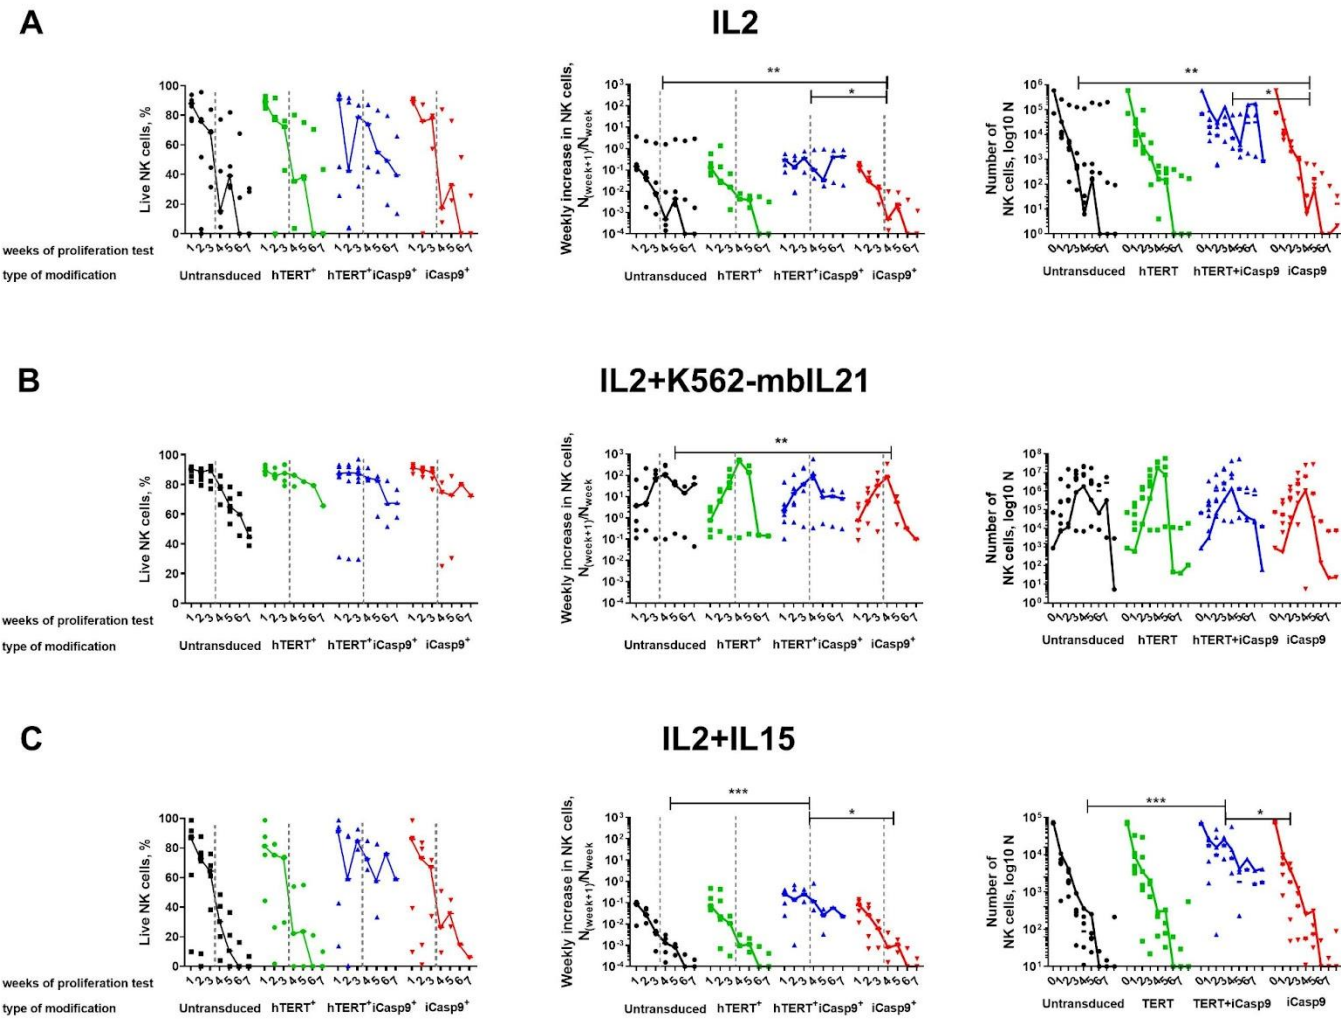

**Figure S2.** Proliferation assay started in a 1 month after ex vivo isolation for NK cells modified with hTERT and/or iCasp9 transgenes. Stimulation with A) IL2, B) IL2+K562-mbIL21 and C) IL2+IL15 was performed. For each stimulation type the proportion of live NK cells (left panel) and the expansion coefficient (right panel) are presented. Friedman test with Dunn's multiple comparison, n=7, median, p-value: \* p < 0.05; \*\* p < 0.01; \*\*\* p < 0.001.

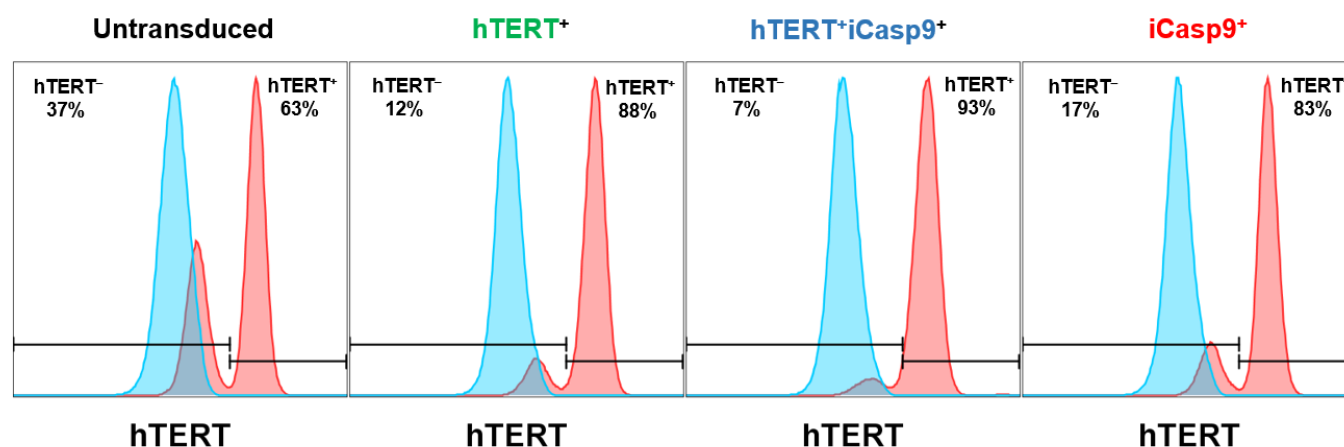

**Figure S3.** The levels of catalytic subunit of telomerase hTERT measured by intracellular staining and subsequent FACS analysis in unmodified and hTERT and/or iCasp9 transduced NK cells cultured with IL2+K562-mbIL21 feeder cells for 2 months. Blue histogram stands for second antibody control. Red histogram represents hTERT staining.

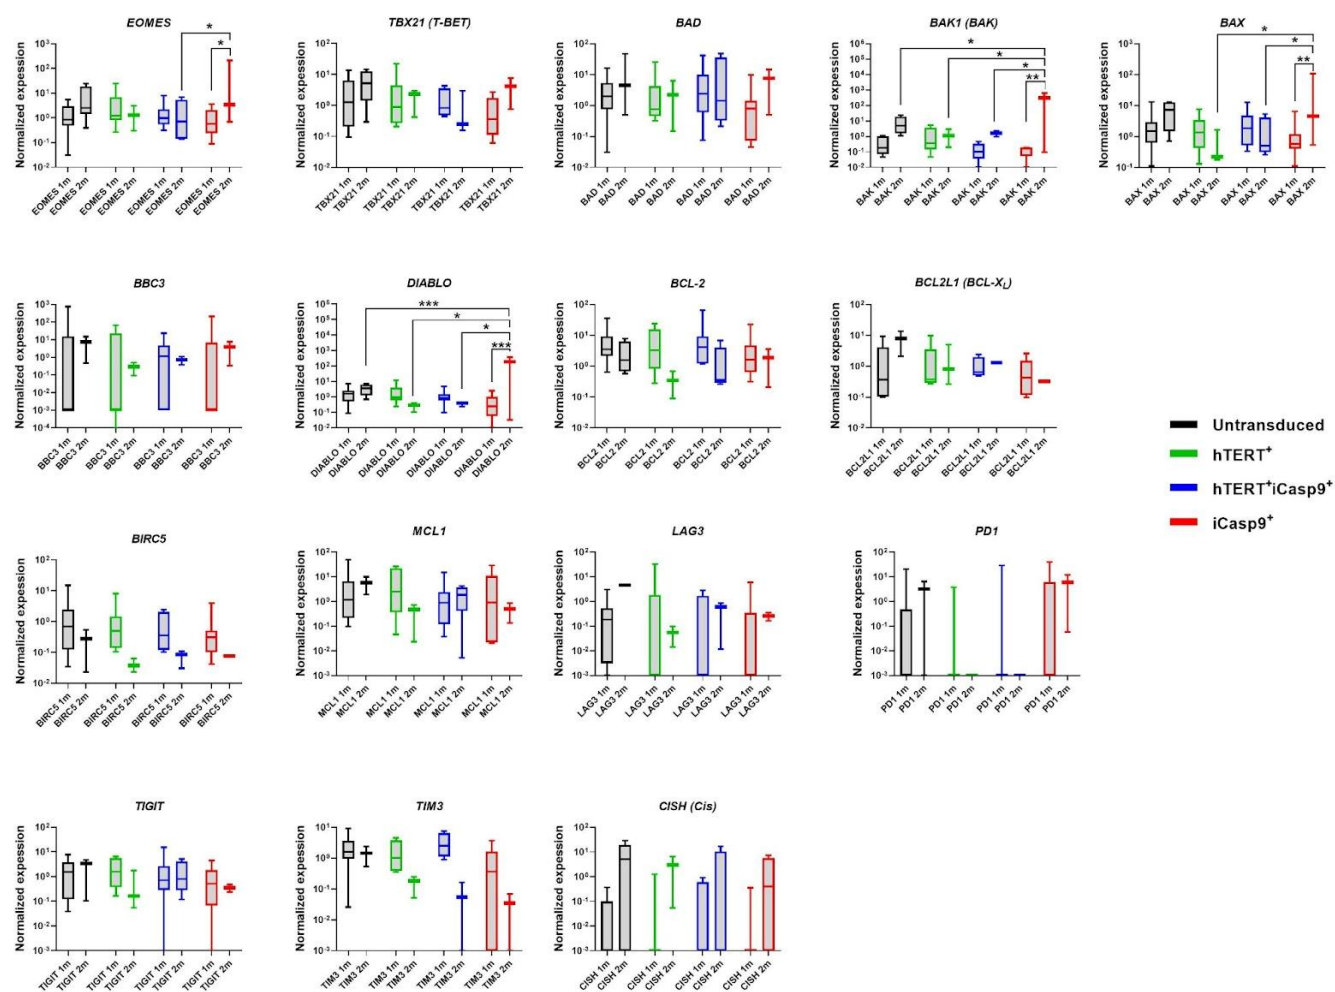

**Figure S4.** The dynamics of normalized mRNA expression levels of the EOMES and TBX21 genes encoding transcription factors EOMES and T-BET along with expression levels of prosurvival BCL2, MCL1, BCL2L1 (BCL-XL) and BIRC5, pro-apoptotic BAX, BAD, BAK, DIABLO and BBC3 (PUMA), immune check-point encoding genes TIM3, TIGIT and LAG3 and exhaustion associated SOCS1-3 and CISH. Data obtained at time points of 1 month (1m) and 2 months (2m) after ex vivo isolation of hTERT and/or iCasp9 modified NK cells cultured with IL2+K562-mbIL21. 2-way Anova, Tukey's multiple comparisons, N1m=10, N2m=3, median, p-value: \* p < 0.05; \*\* p < 0.01; \*\*\* p < 0.001.

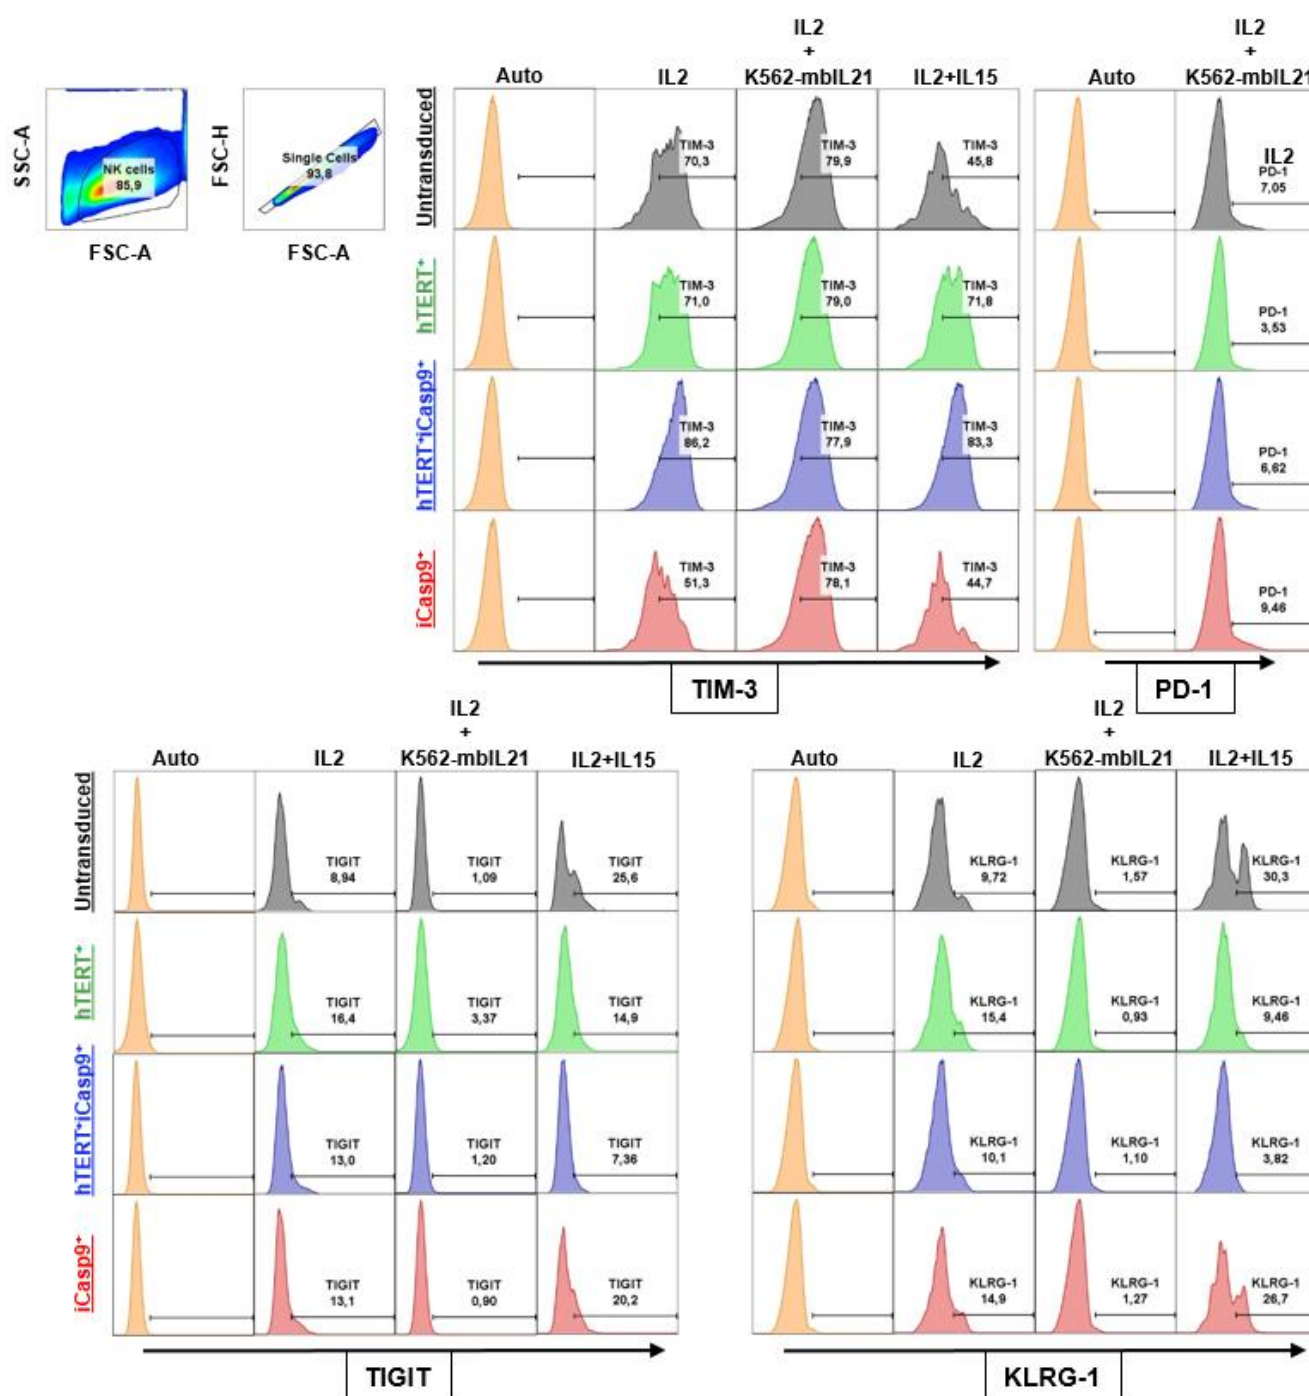

**Figure S5.** Representative plots describing gating strategy and representative fractions of TIM-3, TIGIT, KLRG-1 and PD-1 NK cells unmodified and modified with *hTERT* and/or *iCasp9* genes at a time point of 2 months after isolation. NK cells were cultured with 3 types of stimuli: IL2, IL2+K562-mbIL21, IL2+IL15.



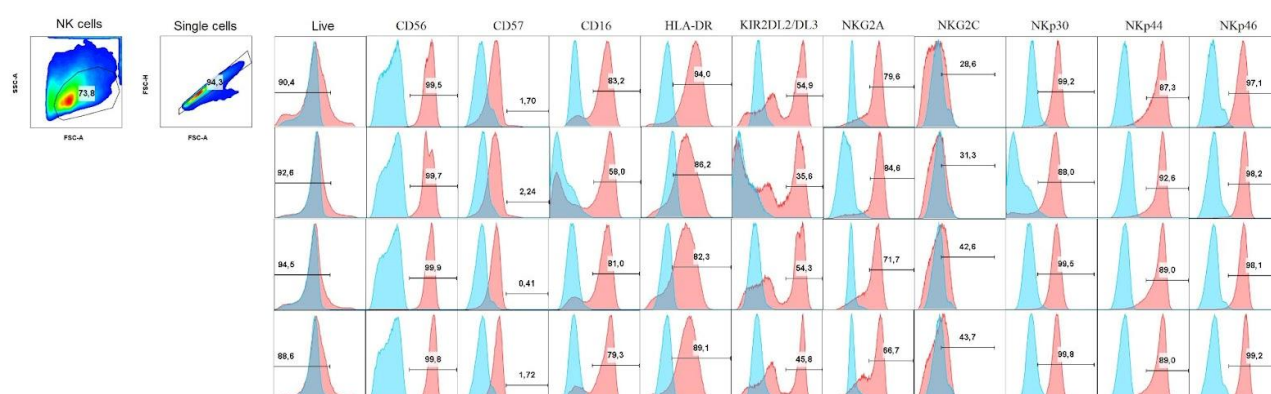

**Figure S6.** Representative plots describing gating strategy for NK cells, single cells and live cells and representative fractions for stained surface markers CD56, CD57, activating receptors CD16, HLA-DR, NKG2C, NKp30, NKp44, NKp46 and inhibitory receptors KIR2DL2/DL3 and NKG2A. Data presented for NK cells unmodified and modified with hTERT and/or iCasp9 genes at a time point of 2 months after isolation. NK cells were cultured with IL2+K562-mbIL21.

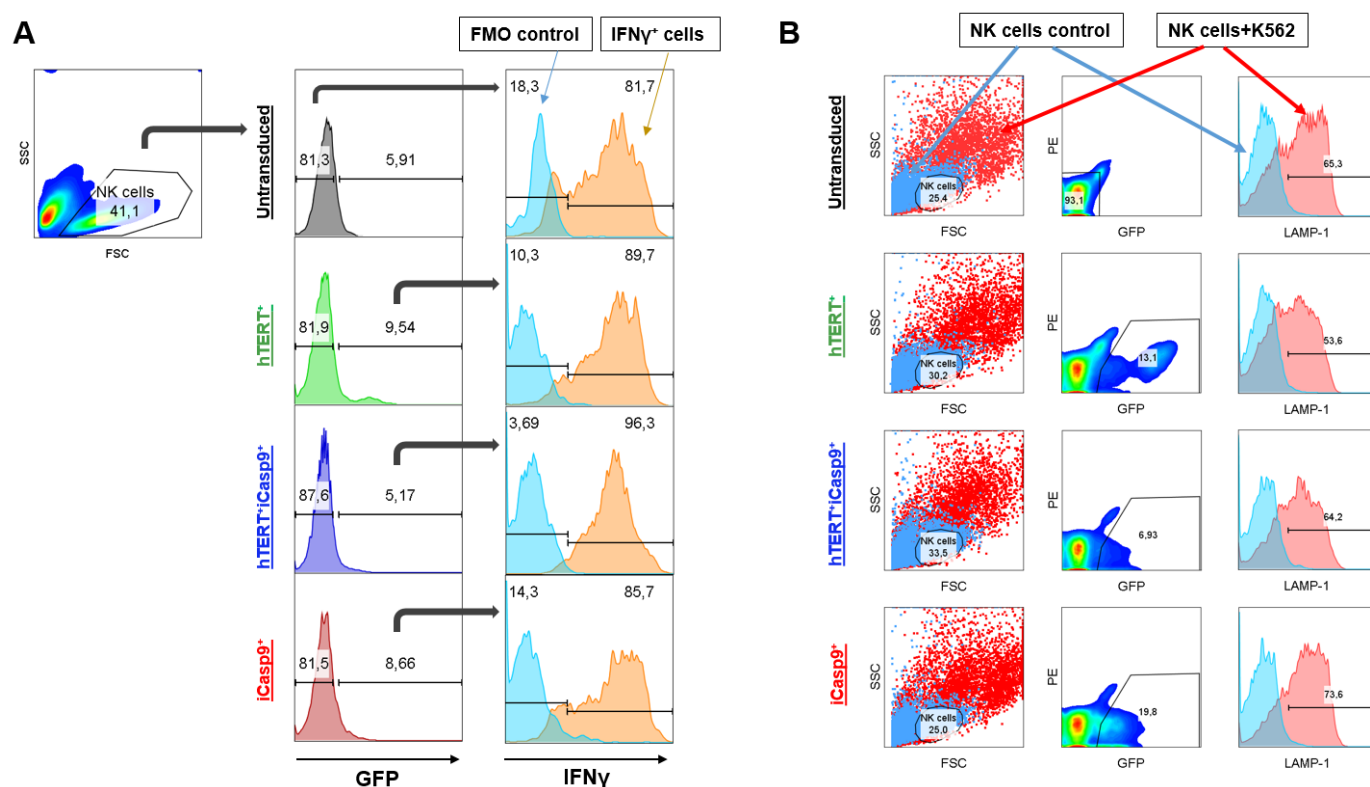

**Figure S7.** Representative plots describing gating strategy for NK cell functional assays. A) Cytokine (IL2, IL12, IL18)-induced IFN $\gamma$  production. NK cells were divided on GFP<sup>+</sup> and GFP<sup>-</sup> cells and that studied for IFN $\gamma$  production. Light blue stands for FMO control. Orange histogram stands for NK cells stained with anti-IFN $\gamma$  antibodies. B) NK cell degranulation determined by LAMP-1 surface exposure in response to target cell (K562 cells) recognition. Blue corresponds with control NK cells incubated without K562 cells and red stands for NK cells mixed with targets.
